# Supplementary material
Source: Research Square preprint supplement (doi:10.21203/rs.3.rs-8854650/v1)
Supplement: Supplementary file 1 [file e1e1738303f5c68001015082.docx]

Supplementary list

**Table S1.** Pre-procedural Imaging and Laboratory Findings

**Table S2.** Procedural and Immediate Post-Procedural Outcomes

**Table S3.** 1-Month Follow-Up Outcomes

**Table S4.** 6-Month Follow-Up Outcomes

**Appendix S1.** Full Inclusion and Exclusion Criteria

**Appendix S2.** VARC-3 Definitions and Follow-up Questionnaire

Table S1: Pre-procedural Imaging and Laboratory Findings

| Patient ID | PAP pre:  (mmHg) | AVA pre:  (cm2) | Mean AVG:  (mmHg) | Peak AVG:  (mmHg) | Bicuspid aortic valve | Aortic annulus perimeter pre: (mm) | Aortic annulus area pre: (mm2) | Aortic annulus diameter average pre: (mm) | LVOT average pre: (mm) | LVOT area pre: (mm2) | LVOT perimeter pre: (mm) | Moderate or severe AVR | Moderate or severe mitral VR | LBBB pre | RBBB pre: | AVB pre: | eGFR pre: | Cr pre: | WBC : | Hgb: | HCT: | AST: | ALT: | Pt: | PTT |
| --- | --- | --- | --- | --- | --- | --- | --- | --- | --- | --- | --- | --- | --- | --- | --- | --- | --- | --- | --- | --- | --- | --- | --- | --- | --- |
| P1 | 40 | 0.9 | 42 | 66 | Yes, type 1 | 74.9 | 590 | 23.1 | 22.9 | 377.5 | 72 | No | No | Yes | No | No | 59.89 | 1.01 | 5100 | 13.5 | 40 | 16 | 9 | 11.8 | 27 |
| P2 | NA | 0.66 | 66 | 90 | No | 77.4 | 523 | 25.5 | 25.1 | 469.8 | 79.1 | No | No | No | Yes | No | 74.72 | 0.88 | 5680 | 19.6 | 32 | 24 | 12 | 11.9 | 34.9 |
| P3 | 30 | 1.08 | 29 | 45 | No | 65.9 | 327 | 20.9 | 19.8 | 274.9 | 62.4 | No | No | No | No | No | 30 | 1.69 | 6990 | 10.2 | 31.8 | 26 | 8 | 12.3 | NA |
| P4 | 40 | 0.47 | 90 | 143 | Yes, type 0 | 81.1 | 522 | 25.8 | 24.3 | 457 | 76/4 | No | No | No | No | No | 86 | 0.76 | 7760 | 13.9 | 39.5 | 20 | 14 | 11 | 21.5 |
| P5 | 53 | 0.8 | 44 | 76 | No | 84.3 | 260 | 26.9 | 24.6 | 459.7 | 77.5 | No | No | No | No | No | 100.46 | 0.84 | 12300 | 17 | 5.5 | 27 | 28 | 11.2 | 49.3 |
| P6 | NA | 1 | 44 | 66 | No | 70.3 | 392 | 22.3 | 21.7 | 368.4 | 68.2 | No | Yes | No | No | No | NA | 0.78 | 9080 | 8.7 | 28.1 | 11 | 8 | 12.9 | 29.1 |
| P7 | 31 | 0.88 | 21 | 39 | No | 75.3 | 443 | 23.9 | 24.6 | 464.9 | 77.4 | No | No | No | No | No | 57.2 | 1.22 | 13800 | 14.7 | 44.2 | 24 | 14 | 12.8 | 27.1 |
| P8 | 50 | 1.3 | 45 | 72 | No | 70.8 | 388 | 22.5 | 22.1 | 379.2 | 69.7 | No | Yes | No | No | No | 57 | 1.16 | 4550 | 10.2 | 31.8 | 13 | 8 | 12 | 25.5 |
| P9 | 35 | 0.9 | 57 | 78 | Yes, type 1 | 73.5 | 434 | 25 | 23.2 | 418.6 | 73.1 | No | No | No | No | No | No | 1.1 | 7000 | 11.4 | 35.8 | 14 | 16 | 12 | 30 |
| P10 | NA | 1 | 38 | 70 | Yes, type 1 | 89 | 606 | 27,4 | 27,6 | 583.9 | 87 | No | No | No | No | No | No | 1.1 | 7600 | 14.6 | 45.6 | 18 | 16 | 13.8 | NA |
| P11 | 33 | 1 | 25 | 43 | NA | NA | NA | NA | NA | NA | NA | No | No | NA | NA | NA | NA | NA | NA | NA | NA | NA | NA | NA | NA |
| P12 | 50 | 0.3 | 58 | 85 | No | 75.3 | 429 | 23.7 | 23,6 | 432.9 | 74.3 | Yes | No | No | No | No | No | 1.6 | 9400 | 11.1 | 38 | 17 | 13 | 16.3 | 28 |
| P13 | 35 | 0.75 | 29 | 44 | NO | 65 | 325 | 23.05 | 20 | 293.2 | 63 | No | Yes | Yes | No | No | 74 | 0.87 | 4600 | 12.6 | 37.3 | 27 | 11 | 11.7 | 24.3 |

NA indicates data not available.

Table S2: Procedural and Immediate Post-Procedural Outcomes

| Patient ID | Total procedural time | local anesthesia | TAVI valve type | Prosthetic valve malposition | Aortic valve mean gradient:  (mmHg) | Aortic valve peak gradient:  (mmHg) | Moderate/severe prosthetic valve regurgitation | PVL grade | Moderate/severe mitral valve regurgitation | LVEF post | PAP: (mmHg) | Peri-procedural coronary obstruction<72h | Cardiac tamponade< 72 h | Procedural mortality | Technical success | Device success |
| --- | --- | --- | --- | --- | --- | --- | --- | --- | --- | --- | --- | --- | --- | --- | --- | --- |
| P1 | 50 | Yes | VIENNA #29 | No | 6 | 9 | No | Mild | No | 55% | 38 | No | No | No | Yes | Yes |
| P2 | 40 | Yes | VIENNA #29 | No | 16 | 25 | No | No | No | 55% | 40 | No | No | No | Yes | Yes |
| P3 | 38 | Yes | VIENNA #26 | No | 9 | 16 | No | No | No | 50% | 19-24 | No | No | No | Yes | Yes |
| P4 | 45 | Yes | VIENNA #26 | No | 13 | 26 | No | Mild | No | 65% | 25 | No | No | No | Yes | Yes |
| P5 | 50 | Yes | VIENNA #29 | No | 15 | 29 | No | Mild | No | 60% | 35 | No | No | No | Yes | Yes |
| P6 | 43 | Yes | VIENNA #26 | No | 9 | 6 | No | Mild | Yes | 55% | NA | No | No | No | Yes | Yes |
| P7 | 55 | Yes | VIENNA #29 | No | NA | NA | NA | NA | No | NA | NA | No | No | Yes | No | No |
| P8 | 40 | Yes | VIENNA #26 | No | 8 | 16 | No | Mild | Yes | 50% | 43 | No | No | No | Yes | Yes |
| P9 | 40 | Yes | VIENNA #26 | No | NA | NA | No | No | No | 55% | 32 | No | No | No | Yes | Yes |
| P10 | 40 | Yes | VIENNA #31 | No | 7 | 11 | No | No | No | 50% | 25 | No | No | No | Yes | Yes |
| P11 | NA | Yes | VIENNA #26 | No | 7 | 14 | No | Mild | No | 50% | 19-24 | No | No | No | Yes | Yes |
| P12 | 45 | Yes | VIENNA #29 | No | 6 | 14 | No | Mild | No | 50% | 45 | No | No | No | Yes | Yes |
| P13 | 38 | Yes | VIENNA #23 | No | 10 | 20 | No | No | Yes | 60% | 60 | No | No | No | Yes | Yes |

NA indicates data not available.

Tables S3: 1-Month Follow-Up Outcomes

| Patient ID | All cause death | Cardiovascular death | AMI | Coronary obstructive requiring intervention | Major vascular complication | AKI | Major bleeding | rehospitalization | Valve related dysfunction | Conduction problem requiring pacemaker | All stroke | Repeat procedure | New onset AF | prosthetic valve endocarditis, thrombosis, migration, embolization | Hospitalization for valve-related symptoms or CHF | New permanent pacemaker | LVEF | Aortic valve PG: (mmHg) | Aortic valve MG: (mmHg) |
| --- | --- | --- | --- | --- | --- | --- | --- | --- | --- | --- | --- | --- | --- | --- | --- | --- | --- | --- | --- |
| P1 | No | No | No | No | No | No | No | No | No | No | No | No | No | No | No | No | 55% | 14 | 9 |
| P2 | No | No | No | No | No | No | No | No | No | No | No | No | No | No | No | No | 55% | 25 | 14 |
| P3 | No | No | No | No | No | Yes | No | Yes | No | Yes | No | No | No | No | No | No | 55% | 23 | 12 |
| P4 | No | No | No | No | No | No | No | No | No | No | No | No | No | No | No | No | 60% | 25 | 14 |
| P5 | No | No | No | No | No | No | No | No | No | No | No | No | No | No | No | No | 60% | 24 | 14 |
| P6 | No | No | No | No | No | No | No | No | No | No | No | No | No | No | No | No | NA | NA | NA |
| P7 | Yes | Yes | No | No | No | No | No | No | No | No | No | No | No | No | No | No | 55% | 23 | 12 |
| P8 | No | No | No | No | No | No | No | No | No | No | No | No | No | No | No | No | 45% | 10 | 4 |
| P9 | No | No | No | No | No | No | No | No | No | No | No | No | No | No | No | No | 55% | 28 | 18 |
| P10 | No | No | No | No | No | No | No | No | No | No | No | No | No | No | No | No | NA | NA | NA |
| P11 | No | No | No | No | No | No | No | No | No | No | No | No | No | No | No | No | 60% | 25 | 14 |
| P12 | No | No | No | No | Yes | No | No | Yes | No | No | No | No | No | No | No | No | 55% | 9 | 8 |
| P13 | No | No | No | No | No | No | No | No | No | No | No | No | No | No | No | No | 55% | 21 | 11 |

NA indicates data not available.

Table S4: 6-Month Follow-Up Outcome

| Patient ID | All cause death | Cardiovascular death | AMI | Coronary obstructive requiring intervention | Major vascular complication | AKI | Major bleeding | rehospitalization | Valve-related dysfunction | Conduction problem requiring a pacemaker | All stroke | Repeat procedure | New onset AF | prosthetic valve endocarditis, thrombosis, migration, embolization | Hospitalization for valve-related symptoms or CHF | New permanent pacemaker | LVEF: | Aortic valve PG: (mmHg) | Aortic valve MG: (mmHg) |
| --- | --- | --- | --- | --- | --- | --- | --- | --- | --- | --- | --- | --- | --- | --- | --- | --- | --- | --- | --- |
| P1 | No | No | No | No | No | No | No | No | No | No | No | No | No | No | No | No | 55% | 16 | 9 |
| P2 | No | No | No | No | No | No | No | Yes | No | No | No | No | No | No | No | No | 55% | 37 | 21 |
| P3 | No | No | No | No | No | No | No | No | No | No | No | No | No | No | No | No | 50% | 18 | 11 |
| P4 | No | No | No | No | No | No | No | No | No | No | No | No | No | No | No | No | 55% | 16 | 9 |
| P5 | No | No | No | No | No | No | No | No | No | No | No | No | No | No | No | No | 60% | 22 | 11 |
| P6 | No | No | No | No | No | No | No | No | No | No | No | No | No | No | No | No | NA | NA | NA |
| P7 | Yes | Yes | No | No | No | No | No | No | No | No | No | No | No | No | No | No | 50% | 18 | 11 |
| P8 | No | No | No | No | No | No | No | No | No | No | No | No | No | No | No | No | 50% | NA | 14 |
| P9 | No | No | No | No | No | No | No | No | No | No | No | No | No | No | No | No | 55% | 26 | 17 |
| P10 | No | No | No | No | No | No | No | No | No | No | No | No | No | No | No | No | NA | NA | NA |
| P11 | No | No | No | No | No | No | No | No | No | No | No | No | No | No | No | No | 55% | 16 | 9 |
| P12 | No | No | No | No | No | No | No | Yes | No | No | No | No | No | No | No | Yes | 55% | 10 | 7 |
| P13 | NA | NA | NA | NA | NA | NA | NA | NA | NA | NA | NA | NA | NA | NA | NA | NA | NA | NA | NA |

NA indicates data not available

**Appendix S1**. **Full Inclusion and Exclusion criteria**

**Criteria for Inclusion**

1. Male and female.
2. Age equal to or greater than 55 years at the time of consent.
3. Women of non-reproductive potential.
4. Severe degenerative calcific stenosis of the native aortic valve, evaluated through resting or dobutamine stress transthoracic echocardiography (TTE):
5. Aortic valve area (AVA) ≤ 1.0 cm² or AVA index ≤ 0.6 cm²/m² and
6. Jet velocity exceeds 4.0 m/s, or the mean gradient surpasses 40 mmHg.
7. Symptomatic aortic stenosis (AS) is characterized by a documented history of at least one of the following:
8. Dyspnea is classified as NYHA class II or higher.
9. Angina pectoris.
10. Cardiac syncope.
11. The subject is classified as at intermediate or high risk for surgical valve replacement based on at least one of the following criteria:
12. EuroSCORE II is greater than or equal to 4%.
13. The Heart Team concurs that the patient faces a significant operative risk of severe morbidity or mortality associated with surgical valve replacement.
14. The local Heart Team, comprising at least one cardiothoracic surgeon and one interventional cardiologist, determines that the patient qualifies for transfemoral TAVI.
15. Aortic annulus diameter based on perimeter measurements between ≥ 18 mm and ≤ 31 mm, assessed via computed tomography (CT) conducted within 90 days preceding the intended implantation.
16. Sufficient iliofemoral access with a minimum average vessel diameter of ≥ 6.0mm and an acceptable degree of vessel calcification and tortuosity for the secure placement of the introducer sheath.
17. The distance from the coronary ostia to the aortic annulus exceeds 12 mm.
18. The patient, or their legal representative, comprehends the study requirements and treatment procedures, and grants written informed consent.
19. The patient and the attending physician concur that the patient will attend all necessary post-procedure follow-up appointments.

**Criteria for Exclusion**

Cardiovascular system:

1. The patient possesses a congenital unicuspid aortic valve or non-calcified valves.
2. Evidence of an acute myocardial infarction (MI) occurring within 30 days prior to the IMD implantation, characterized as either Q-wave MI or non-Q-wave MI with total CK elevation at least twice the normal level, accompanied by CK-MB elevation and/or troponin elevation.
3. The patient experienced a cerebrovascular stroke or transient ischemic attack (TIA) within the preceding 90 days prior to the implantation of the implantable medical device (IMD).
4. The patient has hypertrophic obstructive cardiomyopathy.
5. History of any therapeutic invasive cardiac procedure, including balloon aortic valvuloplasty, within 30 days preceding the scheduled IMD implantation, excluding pacemaker implantation, which is permitted.
6. Untreated clinically significant coronary artery disease necessitating revascularization at the screening visit.
7. Significant left ventricular dysfunction characterized by a left ventricular ejection fraction (LVEF) of less than 20%, as determined by echocardiography, contrast ventriculography, or radionuclide ventriculography within the preceding 90 days.
8. Patient exhibiting cardiogenic shock characterized by diminished cardiac output, hemodynamic instability, and reliance on vasopressors or mechanical hemodynamic support.
9. The patient exhibits advanced peripheral vascular disease.
10. Including aortic aneurysm characterized by a maximal luminal diameter exceeding 5 cm or the documented presence of thrombus, significant tortuosity, constriction of the abdominal aorta, severe unfolding of the thoracic aorta, or thick (> 5 mm), protruding, or ulcerated atheroma in the aortic arch.
11. Symptomatic carotid or vertebral disease, or successful treatment of carotid stenosis within 30 days prior to IMD implantation.
12. Patient exhibiting iliofemoral vessel attributes that would obstruct the secure navigation of the introducer (severe calcification, tortuosity exceeding two 90-degree bends, diameter less than 6mm, or history of aorto-femoral bypass).
13. Patient exhibiting active bacterial endocarditis within six months of the scheduled implantable medical device.
14. The patient exhibits echocardiographic, CT, and/or MRI evidence of an intracardiac mass, thrombus, or vegetation.
15. The patient possesses a pre-existing prosthetic heart valve in any location (Note: the mitral ring is not a disqualifying factor).
16. The patient exhibits severe mitral regurgitation, severe aortic regurgitation, severe tricuspid regurgitation, or moderate to severe mitral stenosis.
17. The patient requires emergency surgery for any reason at the time of screening and valve implantation.

General:

1. Any condition deemed a contraindication for the implantation of a bioprosthetic valve (e.g., a patient with a contraindication to oral antiplatelet therapy).
2. Patient exhibiting renal insufficiency (eGFR < 30 ml/min according to the Cockcroft-Gault formula) and/or undergoing renal replacement therapy and/or possessing a serum creatinine level exceeding 3.0 mg/dL or 265 μmol/L at the time of screening.
3. Patient with severe pulmonary disease (FEV1 < 30%) or currently utilizing home oxygen therapy.
4. Severe pulmonary hypertension (e.g., pulmonary artery systolic pressure to systemic pressure ratio >1 or mean pulmonary pressure > 55 mmHg evaluated via echocardiography).
5. Patients exhibiting signs of an active systemic infection or sepsis.
6. The patient has a documented hypersensitivity or contraindication to contrast media, bovine tissue, nitinol (titanium or nickel), oral antiplatelet therapy (aspirin, ticlopidine, or clopidogrel), or heparin.
7. The patient exhibits hemoglobin levels below 9 g/dL, platelet counts below 50,000 cells/mm3 or exceeding 700,000 cells/mm3, or white blood cell counts below 1,000 cells/mm3, along with a history of bleeding diathesis or coagulopathy.
8. The patient has peptic ulcer disease or a history of gastrointestinal bleeding within the last three months.
9. The patient declines blood transfusions.
10. The patient has a life expectancy of under 12 months due to non-cardiac comorbidities, as assessed by the Investigator at the time of enrollment.
11. The patient is either pregnant or lactating.
12. Advanced dementia (leading to incapacity for informed consent for the study/procedure, hindering independent living outside a chronic care facility, or significantly complicating rehabilitation from the procedure or adherence to follow-up appointments).
13. Additional medical, social, or psychological conditions that, in the Investigator's judgment, prevent the patient from providing informed consent or complying with the necessary follow-up examinations outlined in the protocol.
14. The patient is presently engaged in another investigational drug or device study that has not achieved its primary endpoint (excluding observational studies).

Appendix S2. Clinical Outcome Definitions and MACE Questionnaire

This structured follow-up questionnaire was used to collect standardized post-procedural outcomes after TAVI. Data were collected during scheduled follow-up visits at 1 month and 6 months of follow-up. Patients were evaluated for the following events according to VARC-3 criteria.

| No. | Question | Definition / Clarification |
| --- | --- | --- |
| 1 | Did the patient die? | Confirmation of mortality during the follow-up period (any cause). |
| 2 | Has the patient died due to any cardiovascular reason? | Death directly attributable to a cardiovascular cause such as myocardial infarction, arrhythmia, heart failure, or sudden cardiac death. |
| 3 | Has the patient had a stroke? If yes, specify the type. | Stroke: Neurological deficit of vascular origin lasting ≥24 hours or resulting in death. • Ischemic stroke: due to vessel occlusion or hypoperfusion. • Hemorrhagic stroke: due to intracerebral or subarachnoid bleeding. |
| 4 | Did the patient develop acute or chronic renal failure? | Acute renal failure (AKI): Increase in serum creatinine by ≥0.3 mg/dL within 48h, or ≥1.5× baseline within 7 days, or urine output <0.5 mL/kg/h for >6h. Chronic renal failure (CKD): eGFR <60 mL/min/1.73 m² for ≥3 months. |
| 5 | Did the patient experience life-threatening bleeding? | Severe bleeding causing hemodynamic instability, organ failure, or requiring transfusion, surgery, or leading to death if untreated. |
| 6 | Did the patient develop heart failure? | Clinical syndrome with reduced cardiac output; symptoms such as dyspnea, edema, or fatigue, supported by echocardiographic findings. |
| 7 | Did the patient experience valvular heart complications? If yes, specify. | Dysfunction of prosthetic or native valves, including stenosis, regurgitation, prolapse, or atresia. Description of the affected valve and mechanism should be recorded. |
| 8 | Was the patient readmitted to the hospital? If yes, state the reason. | Any rehospitalization for cardiac or non-cardiac causes after discharge from the index TAVI procedure. |
| 9 | Did the patient develop cardiac conduction issues or arrhythmia? | New-onset or worsening rhythm disorders, including atrial fibrillation, bradycardia, or conduction blocks (e.g., AV block, bundle branch block). |
| 10 | Did the patient undergo repeat cardiac surgery or intervention? If yes, provide details. | Any additional invasive cardiac procedure (e.g., PCI, redo TAVI, CABG, valve replacement) performed after the initial TAVI. |
| 11 | Was a permanent or temporary pacemaker implanted? If yes, specify the reason and date. | Implantation of a pacing device to manage rhythm or conduction abnormalities following TAVI. Record the indication and implantation date. |
| 12 | Did the patient experience a cardiac blockage requiring intervention? If yes, specify the date. | Coronary artery obstruction is treated with revascularization procedures such as percutaneous coronary intervention (PCI) or coronary artery bypass graft (CABG). |
| 13 | Did the patient experience major bleeding? | Clinically overt bleeding causing ≥2 g/dL hemoglobin drop, requiring transfusion, surgery, or occurring in a critical site (intracranial, retroperitoneal, pericardial, etc.). |
